# Supplementary material for: Structural modification of nickel tetra(thiocyano)corroles during electrochemical water oxidation
Source: Royal Society of Chemistry journal article supplement (doi:10.1039/d4dt01628a), 2024-01-01
Supplement: d4dt01628a1.pdf [file d4dt01628a1.pdf]

## Electronic Supplementary Information (ESI<sup>†</sup>)

# Structural Modification of Nickel Tetra(thiocyano)corroles during Electrochemical Water Oxidation

Panisha Nayak,<sup>a</sup> Ajit Kumar Singh,<sup>b</sup> Manisha Nayak,<sup>a</sup> Subhajit Kar,<sup>a</sup> Kasturi Sahu,<sup>a</sup> Kiran Meena,<sup>a</sup> Dinesh Topwal,<sup>c</sup> Arindam Indra<sup>\*,b</sup> and Sanjib Kar<sup>\*,a</sup>

<sup>a</sup>*School of Chemical Sciences, National Institute of Science Education and Research (NISER), Bhubaneswar – 752050, India, and Homi Bhabha National Institute, Training School Complex, Anushakti Nagar, Mumbai, 400 094, India. E-mail: sanjib@niser.ac.in*

<sup>b</sup>*Department of Chemistry, IIT(BHU), Varanasi, Uttar Pradesh-221005, India. E-mail: arindam.chy@iitbhu.ac.in*

<sup>c</sup>*Institute of Physics, Bhubaneswar 751005, India and Homi Bhabha National Institute, Training School Complex, Anushakti Nagar, Mumbai, 400 094, India.*

**Appendix 1:** Experimental Details of Electrochemical Measurement**Appendix 2:** HOMA calculations**Appendix 3:** Determination of the number of active sites of the Ni(O)(OH)/Ni-corrole with respect to the different activation cycles.**Table S1** Crystallographic data for **1**.**Table S2** UV-Vis. and electrochemical data for **1** and **2**.**Table S3** Comparison of the number of active sites of the Ni(O)(OH)/Ni-corrole with respect to the different activation cycles.**Fig. S1** Visualization of atomic displacement parameters (ADPs) in the X-ray crystallographic depiction of **1**.**Fig. S2** Electronic absorption spectrum of **1** in acetonitrile at 298 K.**Fig. S3** Electronic absorption spectrum of **2** in acetonitrile at 298 K.**Fig. S4** Evolution of the electronic absorption spectra of **2** in the presence of excess triethylamine and trifluoroacetic acid in CH<sub>3</sub>CN.**Fig. S5** ESI-MS spectrum of 2,3,17,18-Tetrathiocyanato-[5,10,15-tris(4-cyanophenyl)corrolato] nickel(II), **1** in CH<sub>3</sub>CN shows the (a) measured spectrum with isotopic distribution pattern (experimental) and (b) isotopic distribution pattern (simulated).**Fig. S6** ESI-MS spectrum of 2,3,17,18-Tetrathiocyanato-[5,15-bis(4-cyanophenyl)-10-(4-bromophenyl)-corrolato] nickel(II), **2** in CH<sub>3</sub>CN shows the (a) measured spectrum with isotopic distribution pattern (experimental) and (b) isotopic distribution pattern (simulated).**Fig. S7** <sup>1</sup>H-NMR spectrum of **1** in CD<sub>3</sub>CN solution.**Fig. S8** <sup>13</sup>C {<sup>1</sup>H}-NMR spectrum of **1** in CD<sub>3</sub>CN solution.**Fig. S9** <sup>1</sup>H-NMR spectrum of **2** in CD<sub>3</sub>CN solution.**Fig. S10** <sup>13</sup>C {<sup>1</sup>H}-NMR spectrum of **2** in CD<sub>3</sub>CN solution.**Fig. S11** LSV profiles of Ni(O)(OH)/Ni-corrole (active catalyst after 100 CV cycles), Ni(O)OH, Ni-corrole, and another molecular complex Ni(dmgH)<sub>2</sub> and bare CC in a 1.0 M aqueous KOH solution (scan rate 2 mV s<sup>-1</sup>).

- Fig. S12** LSV profiles of the Ni(O)(OH)/Ni-corrole@CC with Pt as counter electrode (blue) and Ni(O)(OH)/Ni-corrole@CC with respect to glassy carbon (green) as counter electrode in 1.0 M aqueous KOH solution.
- Fig. S13** Electrochemical activation of Ni(O)(OH)/Ni-corrole via the addition of Fe<sup>3+</sup> to the electrolyte solution, as depicted by a CV cycle.
- Fig. S14** Potential vs. current density plots showing the oxidation peak used for the area integration curve.
- Fig. S15** PXRD of the Ni(O)(OH)/Ni-corrole after 3 CV cycles, 30 CV cycles, and 100 CV cycles.<sup>5</sup>
- Fig. S16** Raman spectra of the Ni(O)(OH)/Ni-corrole after 100 cycles.<sup>6</sup>
- Fig. S17** UV-visible spectra showed the peaks corresponding to the Ni(O)(OH)/Ni-corrole after 30 CV cycles and 100 CV cycles activation.<sup>7</sup>
- Fig. S18** (a-c) The SEM and EDX studies of Ni(O)(OH)/Ni-corrole after the different CV cycle activations showed a change in the morphological feature. (e-g) The EDX data of the catalyst after 3 cycles, 30 cycles, and 100 cycles of CV activation showed that Ni, C, N, O, and S but with a varying amount.
- Fig. S19** The chronoamperometric study of Ni(O)(OH)/Ni-corrole demonstrates the stability of the catalyst for 6 hours.
- Fig. S20** The plausible mechanism for the formation of Ni(O)OH from the Ni-corrole complex by the anodic activation in the alkaline medium.

## Appendix 1: Experimental Details of Electrochemical Measurement

### Activation of carbon cloth

1 cm x 2 cm of carbon cloth was first washed with acetone twice under ultrasonication, then five times with water. Clean carbon cloth was dried at 50 °C for 12 h and treated with nitric acid for 4 h at 100°C. The activated carbon cloth was dried in an air oven at 50° C and used for catalyst deposition.<sup>1</sup>

### Deposition of molecular catalyst on the carbon cloth

4 mg of molecular catalysts were dissolved in 100 mL of ethanol by using ultrasonication for 3 minutes, then 10 microliters of an ethanolic 0.05 wt% Nafion solution was added, then again sonicated for 2 minutes. The liquid was then dropped and cast onto activated carbon cloth (CC).

### Electrochemical measurement

OER and HER experiments were conducted in a 1.0 M aqueous KOH solution in a single compartment having a three-electrode electrochemical cell. We used molecular complex@CC as the working electrode, a Pt wire counter electrode, and an Ag/AgCl as a reference electrode. The equation  $E_{(RHE)} = E_{(Ag/AgCl)} + 0.097 \text{ V} + (0.059 \text{ pH}) \text{ V}$  was used to convert the potentials provided above to the RHE.<sup>2</sup> A constant potential was used in a 1.0 M KOH solution to conduct a chronoamperometric experiment at 1.60 V vs. RHE. All CV and LSV have been 75%  $iR$  corrected. To understand this, the electrochemical activation of the molecular catalyst was performed to reach a constant current density. After that, 2 mg of  $FeCl_3$  was added to the electrolyte solution, and the CV cycle was continued.<sup>3</sup>

1. A. Indra, U. Paik and T. Song, *Angew. Chem. Int. Ed.*, 2018, **57**, 1241-1245.
2. B. B. Yu, Y. W. Hua, Q. Huang, S. Y. Ye, H. D. Zhang, Z. Yan, R. W. Li, J. Wu, Y. Meng and X. Cao, *CrystEngComm*, 2021, **23**, 4700-4707.
3. S. K. Pal, B. Singh, J. K. Yadav, C. L. Yadav, M. G. B. Drew, N. Singh, A. Indra and K. Kumar, *Dalton Trans.*, 2022, **51**, 13003–13014.

## Appendix 2: HOMA calculations

The HOMA values<sup>1</sup> of 2,3,17,18-tetra(thiocyano)-[5,10,15-tris(4-cyanophenyl)corrolato]nickel(II) (1) and [5,10,15-tris(pentafluorophenyl)corrolato]nickel(II)<sup>2</sup> were calculated using the C–C and C–N bond lengths obtained from their X-ray crystallographic structures, according to the following equations:<sup>3</sup>

$$\text{HOMA} = 1 - \frac{1}{n} \left\{ \alpha_{CC} \sum (R_{opt} - R_i)_{CC}^2 + \alpha_{CN} \sum (R_{opt} - R_i)_{CN}^2 \right\}$$

where  $n$  = number of bonds taken into summation,  $\alpha$  = empirical constant,  $R_{opt}$  = optimal bond length and  $R_i$  = bond length of  $i^{th}$  bond.

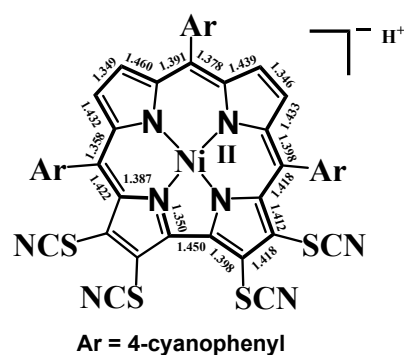

2,3,17,18-tetra(thiocyano)-[5,10,15-tris(4-cyanophenyl)corrolato] nickel(II), 1

**HOMA=0.64**

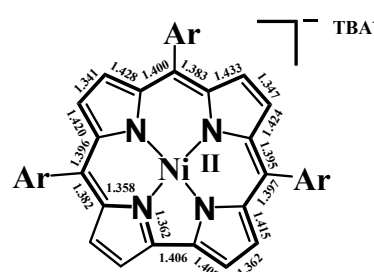

Tris(pentafluorophenyl)corrolato] nickel(II)<sup>2</sup>

**HOMA=0.81**

Selected bond distances and calculated HOMA values<sup>1</sup> for single-crystal structures of 2,3,17,18-tetra(thiocyano)-[5,10,15-tris(4-cyanophenyl)corrolato] nickel(II), **1**, and [5,10,15-tris(pentafluorophenyl)corrolato]nickel(II).<sup>2</sup> The bonds used for HOMA calculations are indicated in bold lines.

## References:

- (a) J. Kruszewski and T. M. Krygowski, *Tetrahedron Lett.* 1972, 13, 3839– 3842; (b) T. M. Krygowski, H. Szatyłowicz, O. A. Stasyuk, J. Dominikowska, M. Palusiak, *Chem. Rev.* 2014, 114, 6383– 6422; (c) C. P. Frizzo and M. A. P. Martins, *Struct. Chem.* 2012, 23, 375– 380.
- Q. C. Chen, S. Fite, N. Fridman, B. Tumanskii, A. Mahammed and Z. Gross, *ACS Catal.*, 2022, **12**, 4310-4317.
- (a) C. A. Hunter, J. K. M. Sanders, *J. Am Chem. Soc.*, 1990, **112**, 5525–5534; (b) R. Nozawa, H. Tanaka, W.-Y. Cha, Y. Hong, I. Hisaki, S. Shimizu, J.-Y. Shin, T. Kowalczyk, S. Irle, D. Kim, *Nat. Commun.* **2016**, **7**, 13620.

**Table S1** Crystallographic data for **1**.

| compound code                                                              | <b>1</b>                                                                          |
|----------------------------------------------------------------------------|-----------------------------------------------------------------------------------|
| chemical formula                                                           | C <sub>88</sub> H <sub>30.40</sub> N <sub>22</sub> Ni <sub>2</sub> S <sub>8</sub> |
| formula mass                                                               | 1769.64                                                                           |
| crystal system                                                             | Triclinic                                                                         |
| crystal size (mm)                                                          | 0.13×0.12×0.10                                                                    |
| space group                                                                | <i>P-1</i>                                                                        |
| Radiation                                                                  | Mo <i>K</i> α                                                                     |
| <i>a</i> (Å)                                                               | 13.5052 (3)                                                                       |
| <i>b</i> (Å)                                                               | 16.0286 (4)                                                                       |
| <i>c</i> (Å)                                                               | 25.3258 (7)                                                                       |
| <i>α</i> (deg)                                                             | 97.682 (2)                                                                        |
| <i>β</i> (deg)                                                             | 102.718 (2)                                                                       |
| <i>γ</i> (deg)                                                             | 90.036 (2)                                                                        |
| <i>V</i> (Å <sup>3</sup> )                                                 | 5297.2 (2)                                                                        |
| <i>Z</i>                                                                   | 2                                                                                 |
| <i>T</i> (K)                                                               | 100.01(11)                                                                        |
| <i>D</i> <sub>calcd</sub> (g cm <sup>-3</sup> )                            | 1.109                                                                             |
| measured reflections                                                       | 46982                                                                             |
| <i>e</i> data ( <i>R</i> <sub>int</sub> )                                  | 11888 (0.0614)                                                                    |
| parameters                                                                 | 1081                                                                              |
| restraints                                                                 | 1004                                                                              |
| <i>μ</i> (mm <sup>-1</sup> )                                               | 0.561                                                                             |
| 2 <i>θ</i> range (deg)                                                     | 6.43 – 50.00                                                                      |
| <i>R</i> 1 ( <i>I</i> > 2σ( <i>I</i> ))                                    | 0.0784                                                                            |
| WR2 (all data)                                                             | 0.2106                                                                            |
| S (GooF) all data                                                          | 1.025                                                                             |
| Δ <i>ρ</i> <sub>max</sub> , Δ <i>ρ</i> <sub>min</sub> (e Å <sup>-3</sup> ) | 0.884, -0.559                                                                     |

**Table S2** UV-Vis. and electrochemical data for **1** and **2**.

| Compound | UV-vis. Data <sup>a</sup><br>$\lambda_{\text{max}} / \text{nm} (\epsilon / \text{M}^{-1}\text{cm}^{-1})$ | Electrochemical data <sup>a,b</sup>                           |                                                               |
|----------|----------------------------------------------------------------------------------------------------------|---------------------------------------------------------------|---------------------------------------------------------------|
|          |                                                                                                          | Oxidation<br>$E^0, \text{V} (\Delta E_{\text{p}}, \text{mV})$ | Reduction<br>$E^0, \text{V} (\Delta E_{\text{p}}, \text{mV})$ |
| <b>1</b> | 401 (70700), 418 (82700),<br>563 (35300), 592 (69000),<br>608 (92700)                                    | +0.71 (80),<br>+1.12 (80)                                     | 1.29                                                          |
| <b>2</b> | 401 (71700), 418 (85500),<br>564 (31700), 592 (60600),<br>611 (87400).                                   | +0.72 (80),<br>+1.14 (80)                                     | 1.35                                                          |

<sup>a</sup> In acetonitrile.

<sup>b</sup> The potentials are *versus* Ag/AgCl.

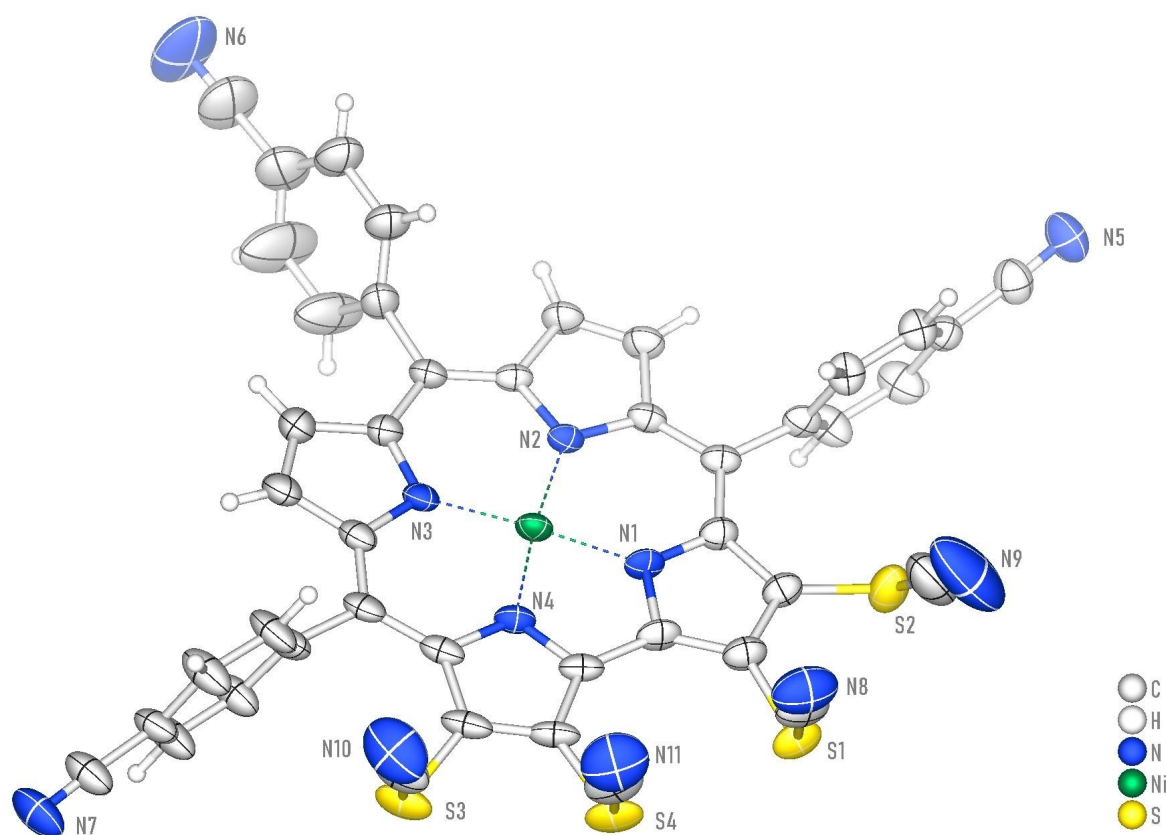

**Fig. S1** Visualization of atomic displacement parameters (ADPs) in the X-ray crystallographic depiction of **1**.



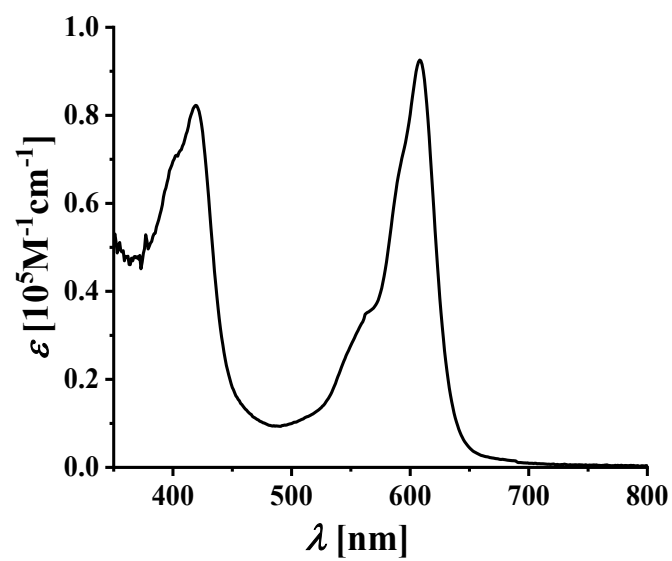

**Fig. S2** Electronic absorption spectrum of **1** in acetonitrile at 298 K.

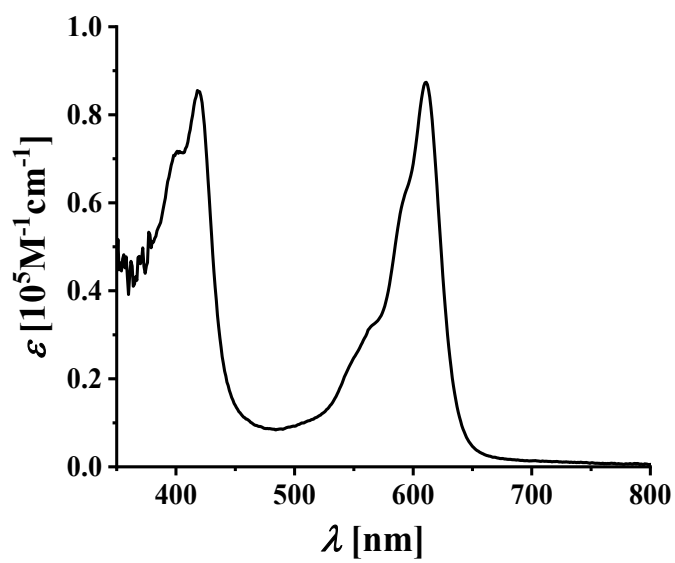

**Fig. S3** Electronic absorption spectrum of **2** in acetonitrile at 298 K.

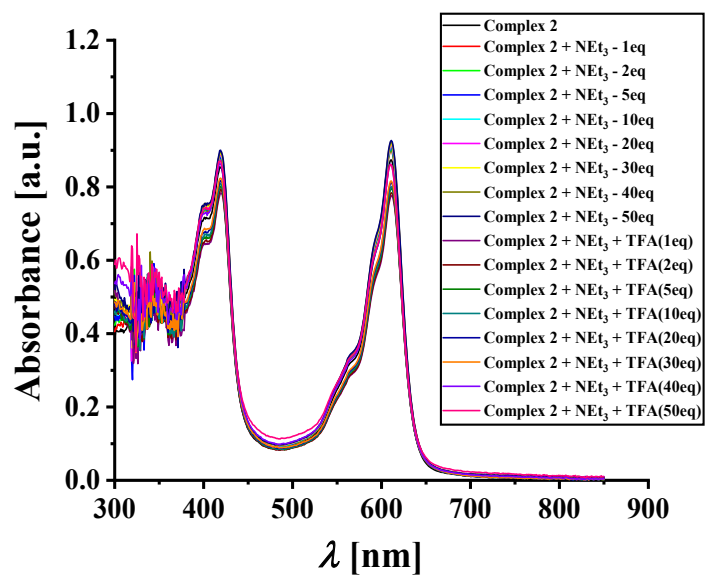

**Fig. S4** Evolution of the electronic absorption spectra of **2** in the presence of excess triethylamine and trifluoroacetic acid in CH<sub>3</sub>CN.

SK\_Ni TCCSCN

05-Mar-2024  
15:02:19

SK\_05032024\_1 44 (0.761) Cm (43:50)

XEVO-G2XSQTOF#NotSet

TOF MS ES-  
6.59e7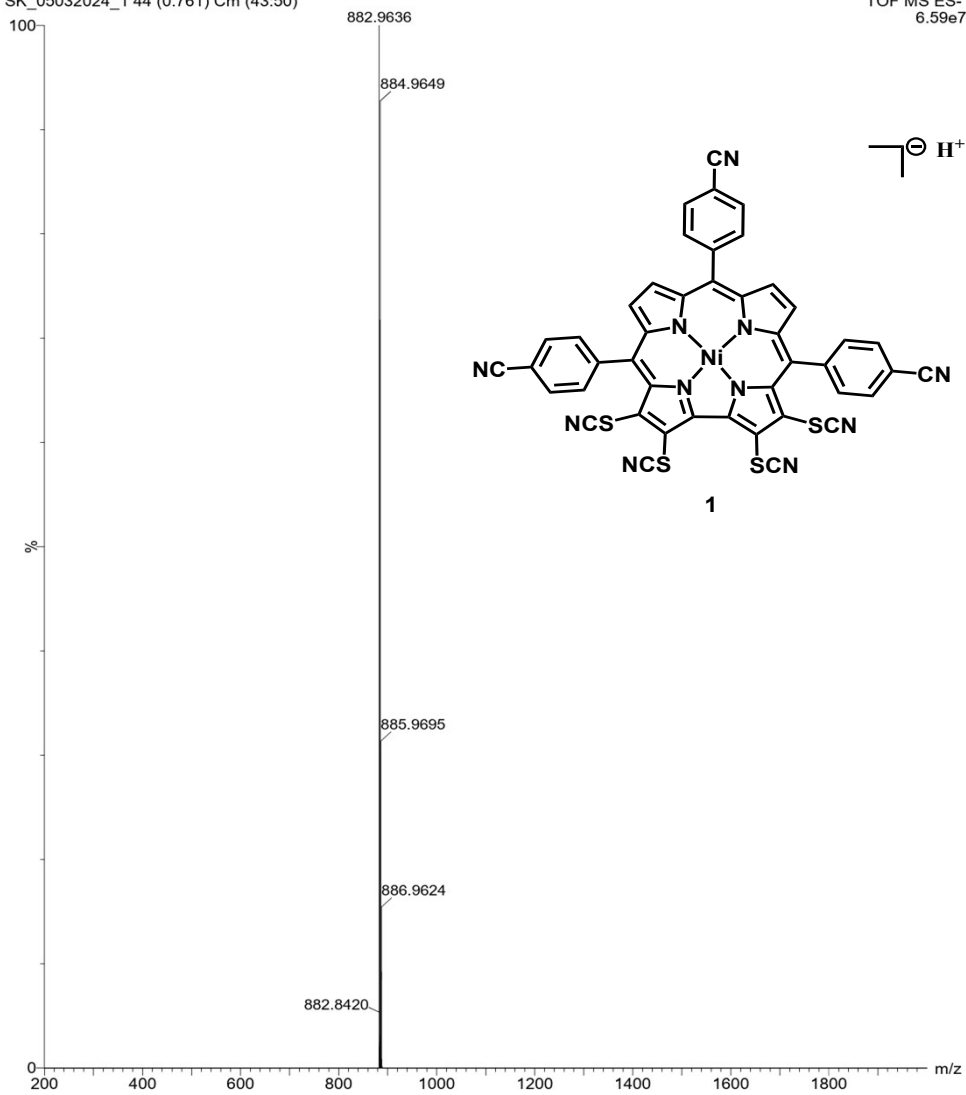

**Fig. S5** (a) ESI-MS spectrum of 2,3,17,18-Tetrathiocyanato-[5,10,15-tris(4-cyanophenyl)corrolato] nickel(II), **1** in CH<sub>3</sub>CN shows the measured spectrum (experimental).

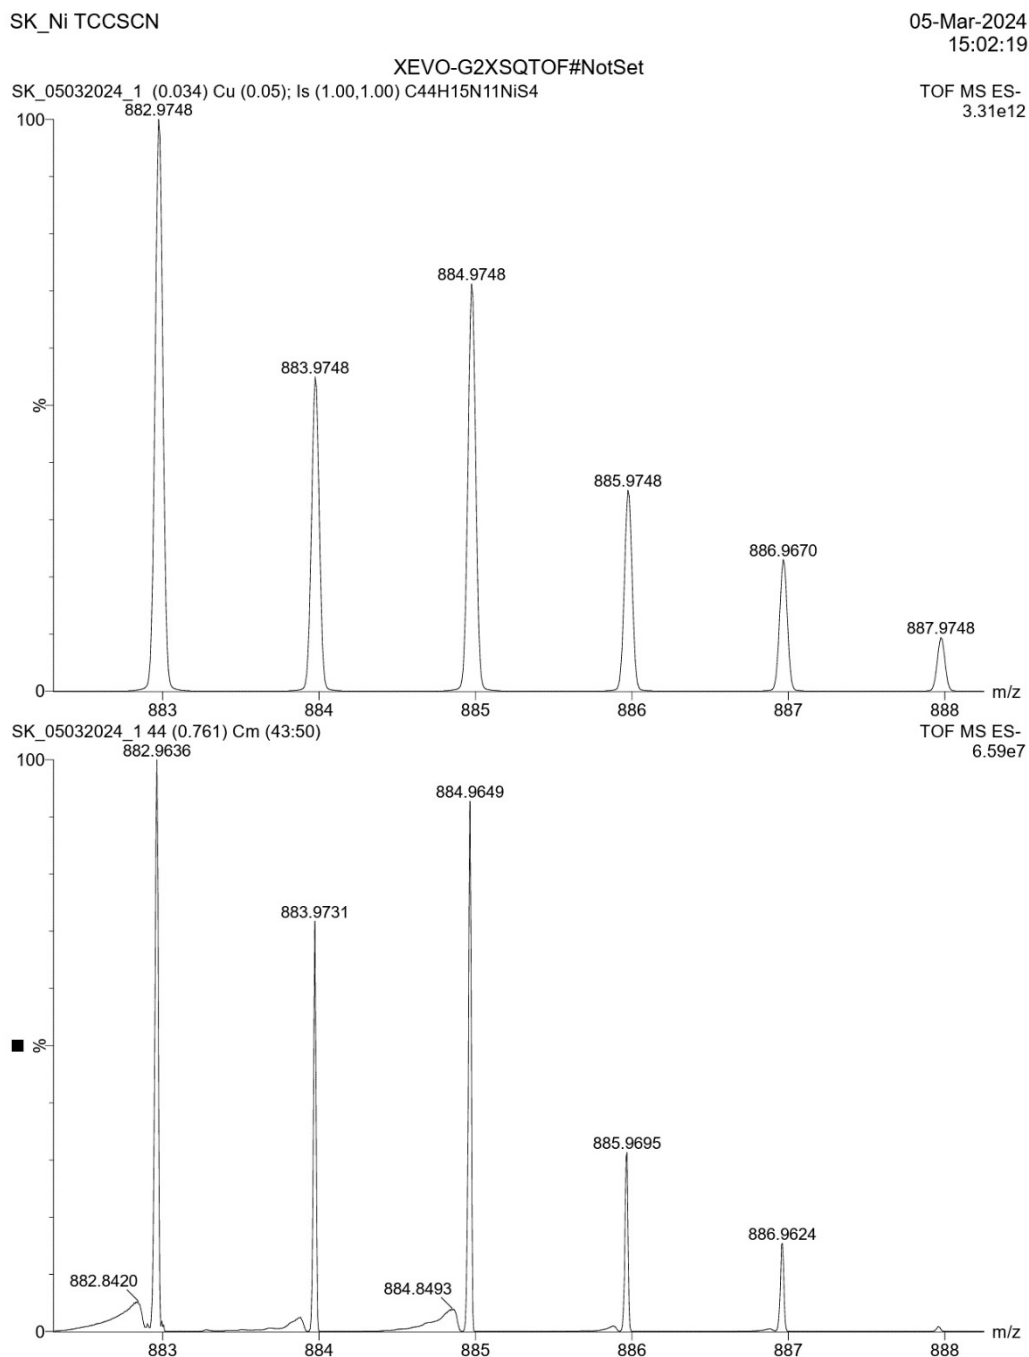

**Fig. S5** (b) ESI-MS spectrum of 2,3,17,18-Tetrathiocyanato-[5,10,15-tris(4-cyanophenyl)corrolato] nickel(II), **1** in CH<sub>3</sub>CN shows the isotopic distribution pattern (simulated).

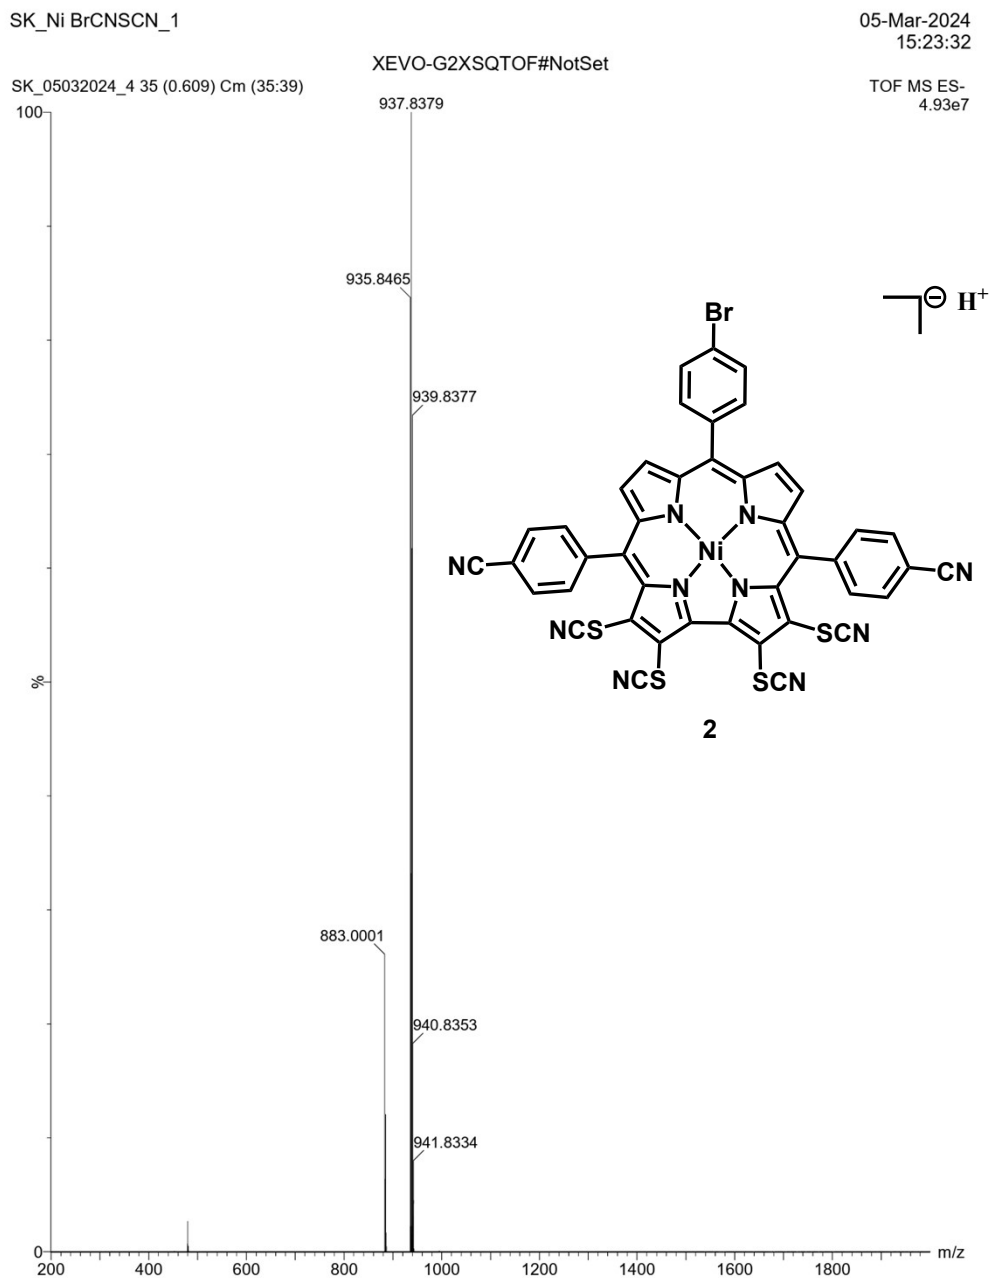

**Fig. S6** (a) ESI-MS spectrum of 2,3,17,18-Tetrathiocyanato-[5,15-bis(4-cyanophenyl)-10-(4-bromophenyl)-corrolato] nickel(II), **2** in CH<sub>3</sub>CN shows the measured spectrum (experimental).

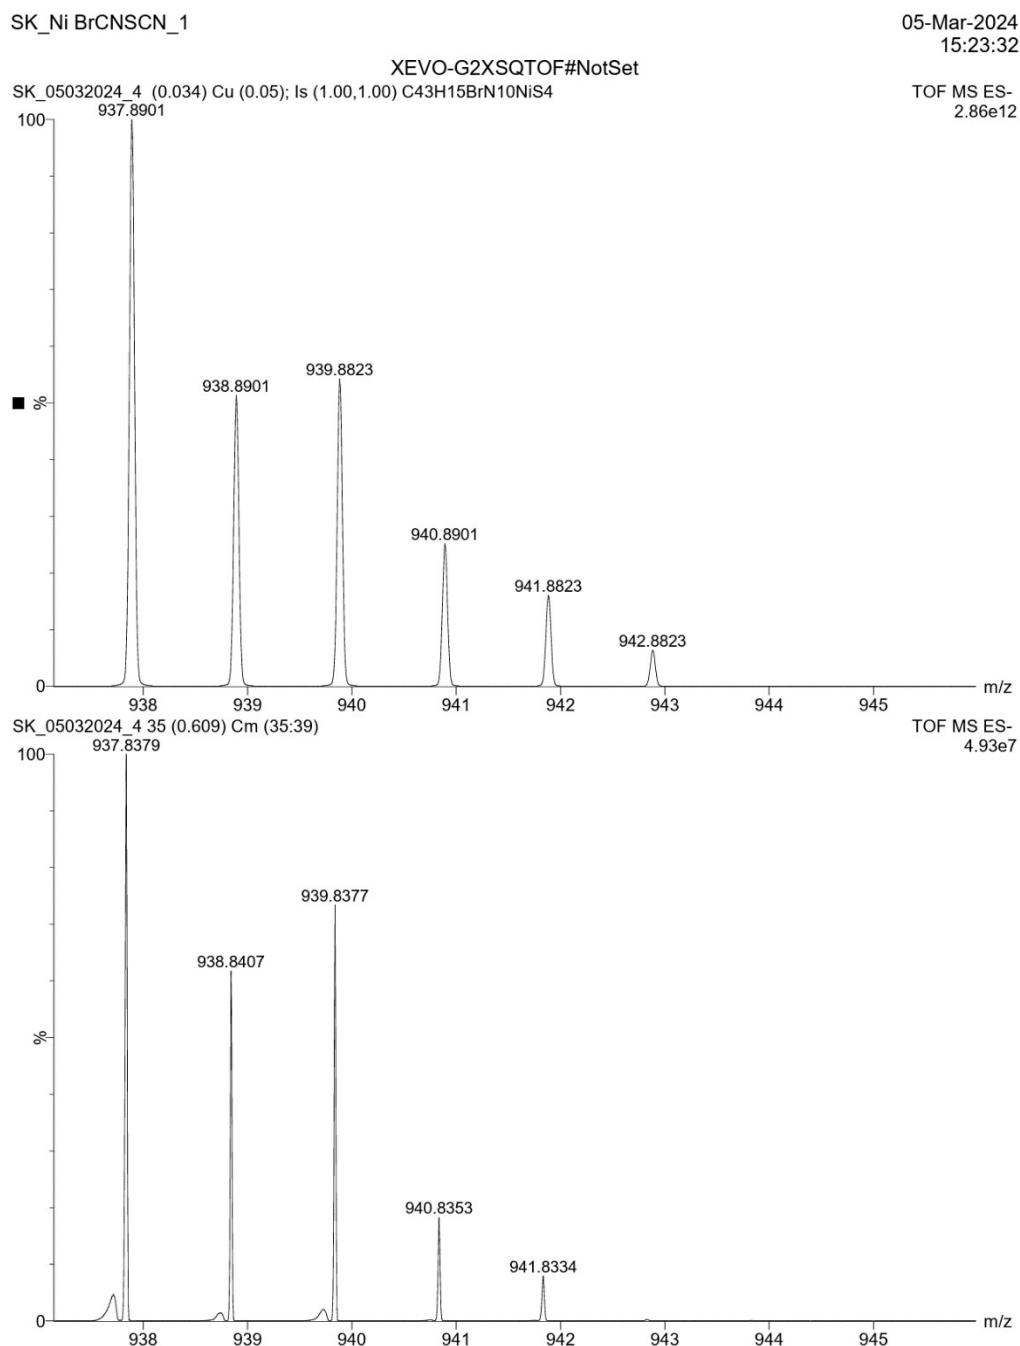

**Fig. S6** (b) ESI-MS spectrum of 2,3,17,18-Tetrathiocyanato-[5,15-bis(4-cyanophenyl)-10-(4-bromophenyl)-corrolato] nickel(II), **2** in CH<sub>3</sub>CN shows the isotopic distribution pattern (simulated).

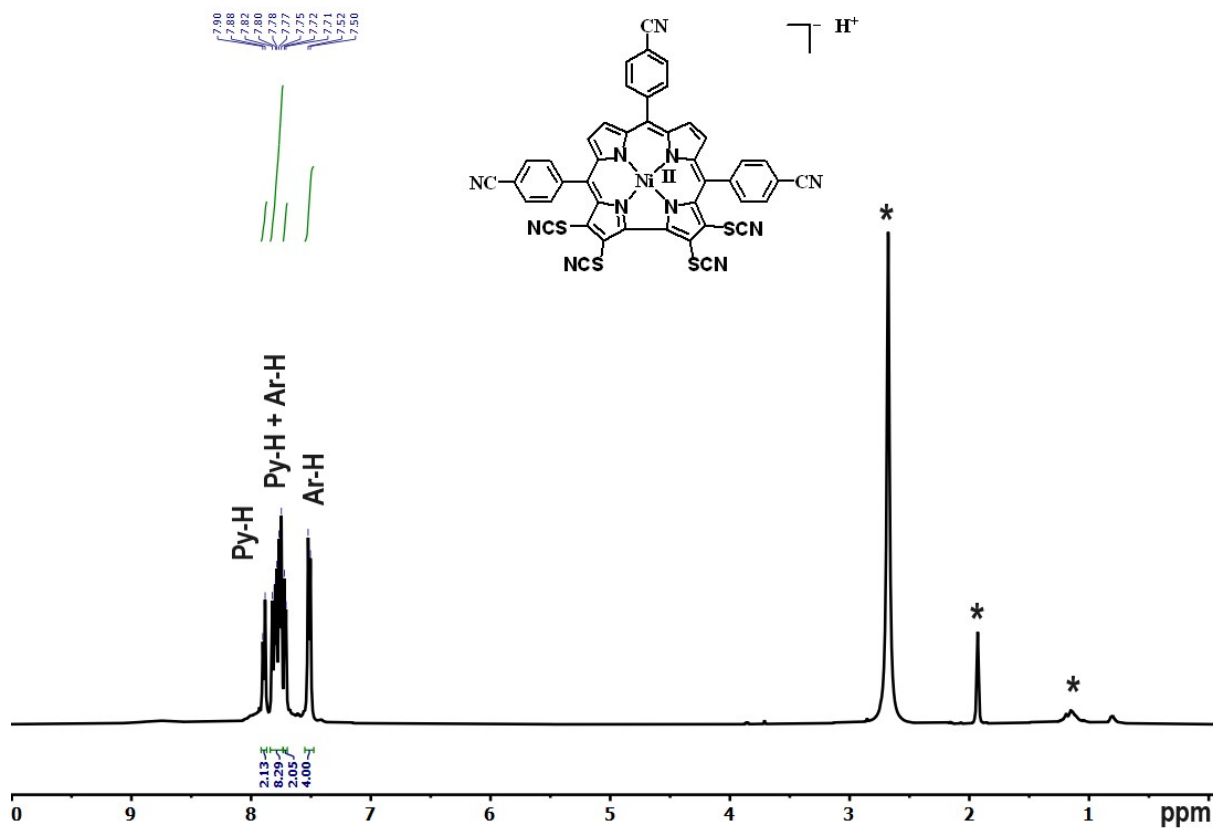

**Fig. S7** <sup>1</sup>H-NMR spectrum of **1** in CD<sub>3</sub>CN solution.



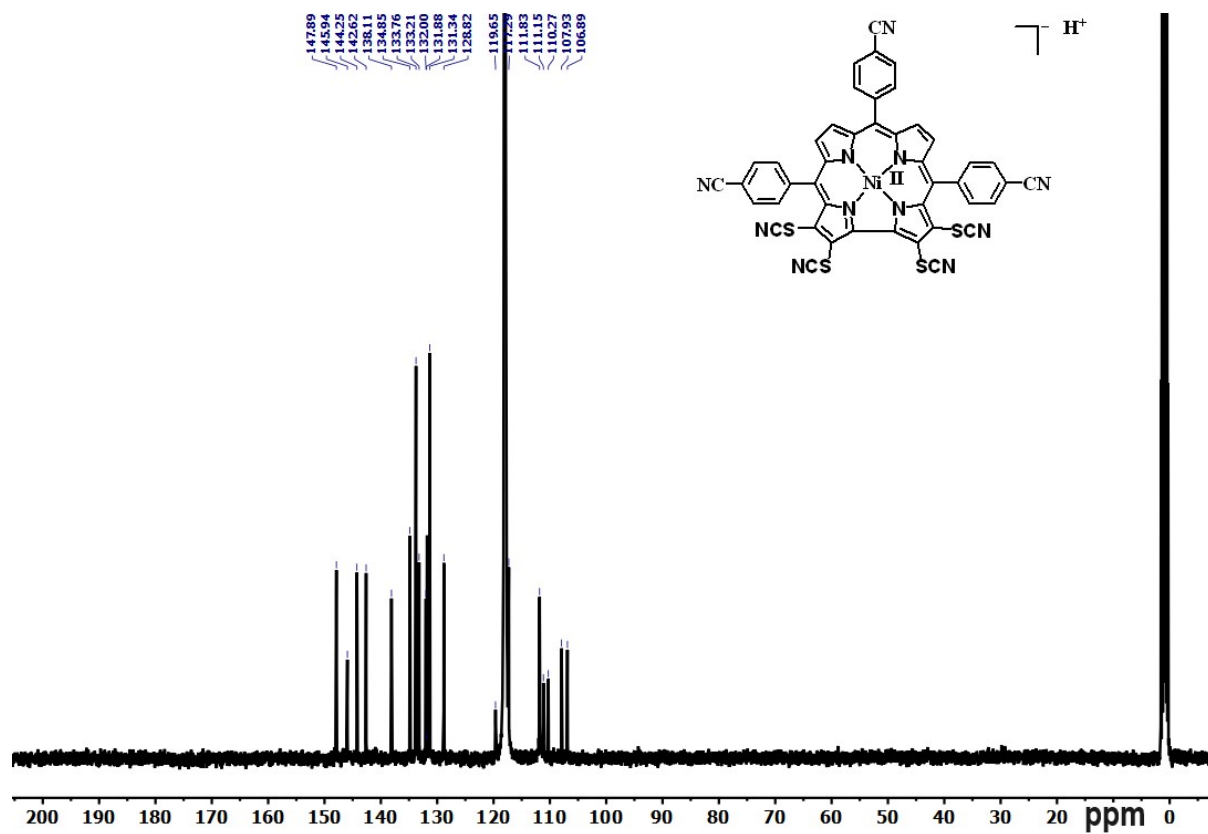

**Fig. S8**  $^{13}\text{C}$   $\{^1\text{H}\}$ -NMR spectrum of **1** in  $\text{CD}_3\text{CN}$  solution.

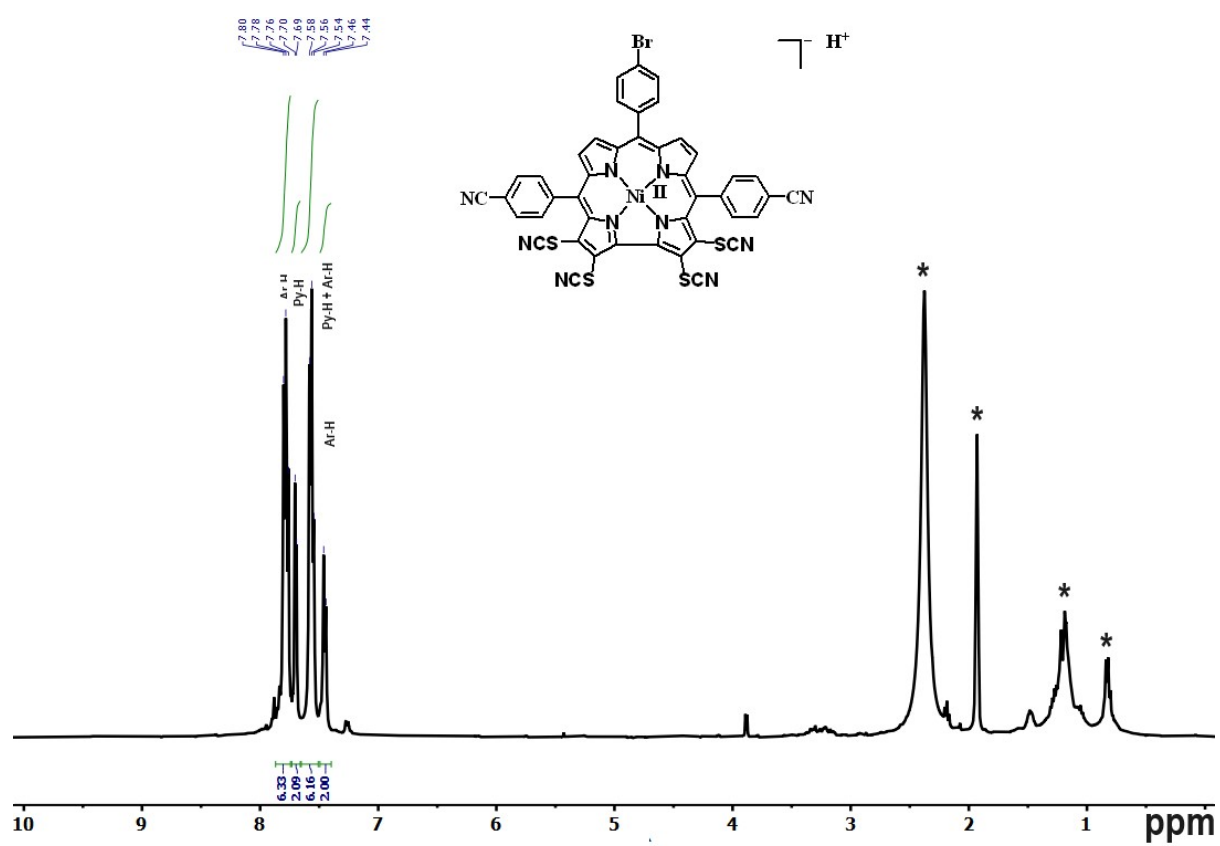

**Fig. S9** <sup>1</sup>H-NMR spectrum of **2** in CD<sub>3</sub>CN solution.

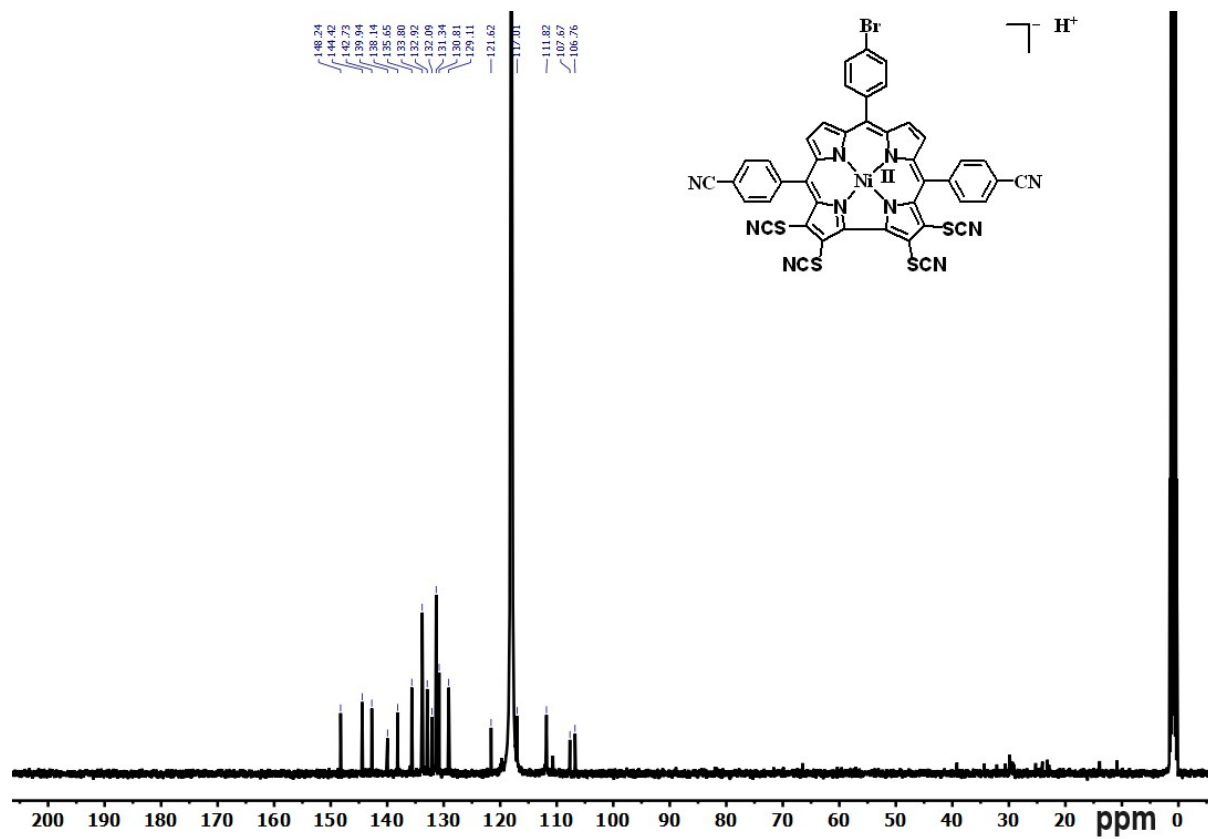

**Fig. S10** <sup>13</sup>C {<sup>1</sup>H}-NMR spectrum of **2** in CD<sub>3</sub>CN solution.

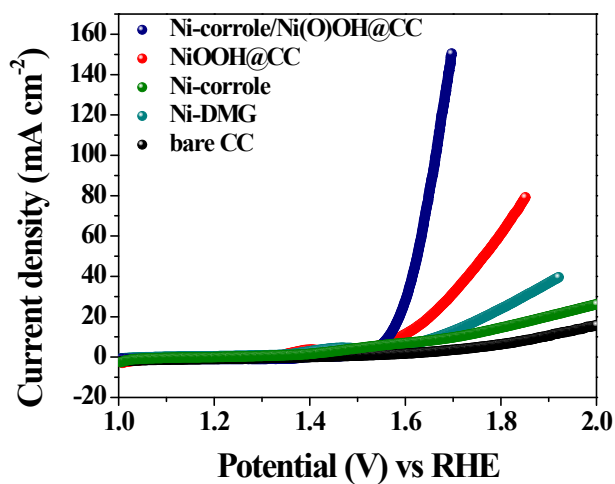

**Fig. S11** LSV profiles of Ni(O)(OH)/Ni-corrole (active catalyst after 100 CV cycles), Ni(O)OH, Ni-corrole, and another molecular complex Ni(dmgh)<sub>2</sub> and bare CC in a 1.0 M aqueous KOH solution (scan rate 2 mV s<sup>-1</sup>).

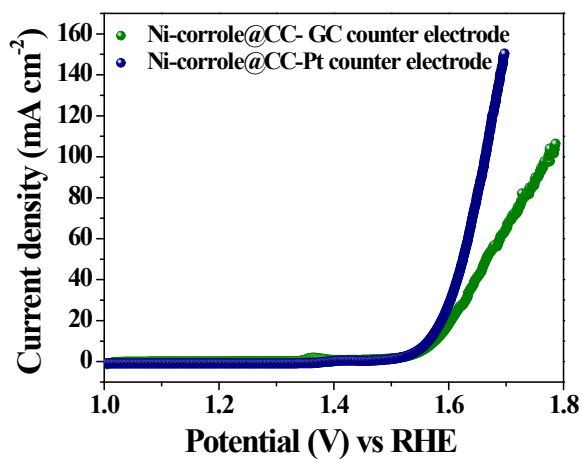

**Fig. S12** LSV profiles of the Ni(O)(OH)/Ni-corrole@CC with Pt as counter electrode (blue) and Ni(O)(OH)/Ni-corrole@CC with respect to glassy carbon (green) as counter electrode in 1.0 M aqueous KOH solution.

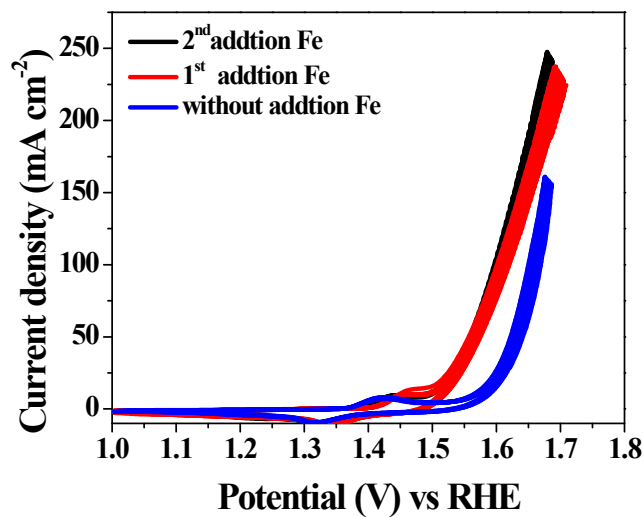

**Fig. S13** Electrochemical activation of Ni(O)(OH)/Ni-corrrole via the addition of Fe<sup>3+</sup> to the electrolyte solution, as depicted by a CV cycle.

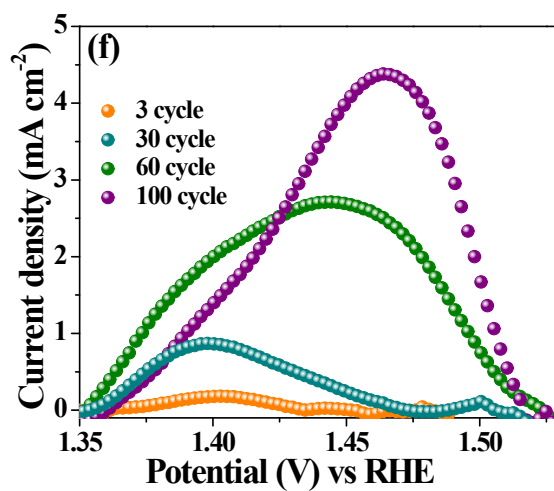

**Fig. S14** Potential vs. current density plots showing the oxidation peak used for the area integration curve.

**Appendix 3:** Determination of the number of active sites of the Ni(O)(OH)/Ni-corrrole with respect to the different activation cycles.

**Determination of the Number of Active Sites after 3 cycle activation <sup>3</sup>**

The area calculated (associated with the oxidation peak) =  $0.0011 \times 10^{-3} \text{ V A}$

The associated charge calculated is =  $0.0011 \times 10^{-3} \text{ V A} / 0.005 \text{ V s}^{-1} = 2.2 \times 10^{-3} \text{ A s} = 2.2 \times 10^{-4} \text{ C}$

Thus the number of electron transferred is =  $2.2 \times 10^{-4} \text{ C} / 1.602 \times 10^{-19} \text{ C} = 1.37 \times 10^{15}$

Since the oxidation of Ni<sup>2+</sup> to Ni<sup>3+</sup> is a single electron transfer reaction, the number of electrons calculated above is the same as the number of active surface sites.

Hence, the surface-active site that participated in OER is =  $1.37 \times 10^{15}$ .

**Determination of the Number of Active Sites after 30 cycle activation <sup>3</sup>**

The area calculated (associated with the oxidation peak) =  $0.063 \times 10^{-3} \text{ V A}$

The associated charge calculated is =  $0.063 \times 10^{-3} \text{ V A} / 0.005 \text{ V s}^{-1} = 12.6 \times 10^{-3} \text{ A s} = 12.6 \times 10^{-3} \text{ C}$

Thus the number of electron transferred is =  $12.6 \times 10^{-3} \text{ C} / 1.602 \times 10^{-19} \text{ C} = 7.86 \times 10^{16}$

Since the oxidation of Ni<sup>2+</sup> to Ni<sup>3+</sup> is a single electron transfer reaction, the number of electrons calculated above is the same as the number of active surface sites.

Hence, the surface-active site that participated in OER is =  $7.86 \times 10^{16}$ .

**Determination of the Number of Active Sites after 60 cycle activation <sup>3</sup>**

The area calculated (associated with the oxidation peak) =  $0.309 \times 10^{-3} \text{ V A}$

The associated charge calculated is =  $0.309 \times 10^{-3} \text{ V A} / 0.005 \text{ V s}^{-1} = 61.8 \times 10^{-3} \text{ A s} = 61.8 \times 10^{-3} \text{ C}$

Thus the number of electron transferred is =  $61.8 \times 10^{-3} \text{ C} / 1.602 \times 10^{-19} \text{ C} = 38.57 \times 10^{16}$

Since the oxidation of Ni<sup>2+</sup> to Ni<sup>3+</sup> is a single electron transfer reaction, the number of electrons calculated above is the same as the number of active surface sites.

Hence, the surface-active site that participated in OER is =  $38.57 \times 10^{16}$

**Determination of the Number of Active Sites after 100 cycle activation <sup>3</sup>**

The area calculated (associated with the oxidation peak) =  $0.381 \times 10^{-3} \text{ V A}$

The associated charge calculated is =  $0.381 \times 10^{-3} \text{ V A} / 0.005 \text{ V s}^{-1} = 76.2 \times 10^{-3} \text{ C}$

Thus, the number of electron transferred is =  $76.2 \times 10^{-3} \text{ C} / 1.602 \times 10^{-19} \text{ C} = 47.56 \times 10^{16}$

Since the oxidation of Ni<sup>2+</sup> to Ni<sup>3+</sup> is a single electron transfer reaction, the number of electrons calculated above is the same as the number of active surface sites.

Hence, the surface-active site that participated in OER is =  $47.56 \times 10^{16}$

#### Calculation of TOF <sup>4</sup>

$$\text{TOF} = (j \times N_A) / (4 \times F \times n)$$

Where,

j = Current density at 330 mV

N<sub>A</sub> = Avogadro number

F = Faraday constant

n = Number of active Ni-sites

$$\begin{aligned} \text{TOF} &= [(10.12 \times 10^{-3}) (6.023 \times 10^{23})] / [(96485) (4) (47.565 \times 10^{16})] \\ &= 3.32 \times 10^{-2} \text{ s}^{-1} \end{aligned}$$

**Table S3.** Comparison of the number of active sites of the Ni(O)(OH)/Ni-corrole with respect to the different activation cycles.

| S.No. | Active catalyst                                | Number active sites       |
|-------|------------------------------------------------|---------------------------|
| 1     | Ni(O)(OH)/Ni-corrole (3 <sup>rd</sup> cycle)   | $1.37 \times 10^{15}$     |
| 2     | Ni(O)(OH)/Ni-corrole (30 <sup>th</sup> cycle)  | $7.86 \times 10^{16}$     |
| 3     | Ni(O)(OH)/Ni-corrole (60 <sup>th</sup> cycle)  | $38.57 \times 10^{16}$    |
| 4     | Ni(O)(OH)/Ni-corrole (100 <sup>th</sup> cycle) | 47.56<br>$\times 10^{16}$ |

#### Reference:

1. A. K. Singh, S. Ji, B. Singh, C. Das, H. Choi, P. W. Menezes and A. Indra, *Mater. Today Chem.* 2022, **23**, 100668.
2. S. Anantharaj, M. Jayachandran and S. Kundu, *Chem. Sci.*, 2016, **7**, 3188-3205.

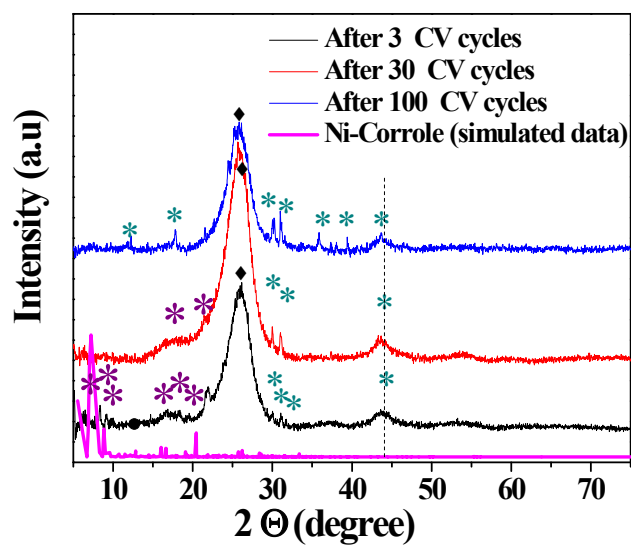

**Fig. S15** PXRD of the Ni(O)(OH)/Ni-corrode after 3 CV cycles, 30 CV cycles, and 100 CV cycles.<sup>5</sup> (Purple\*: Ni-corrode complex, Cyan\*: Ni(O)OH, ◆: Carbon cloth)

**Reference:**

3. Z. Lin, P. Bu, Y. Xiao, Q. Gao and P. Diao, *J. Mater. Chem. A*, 2022, **10**, 20847–20855.



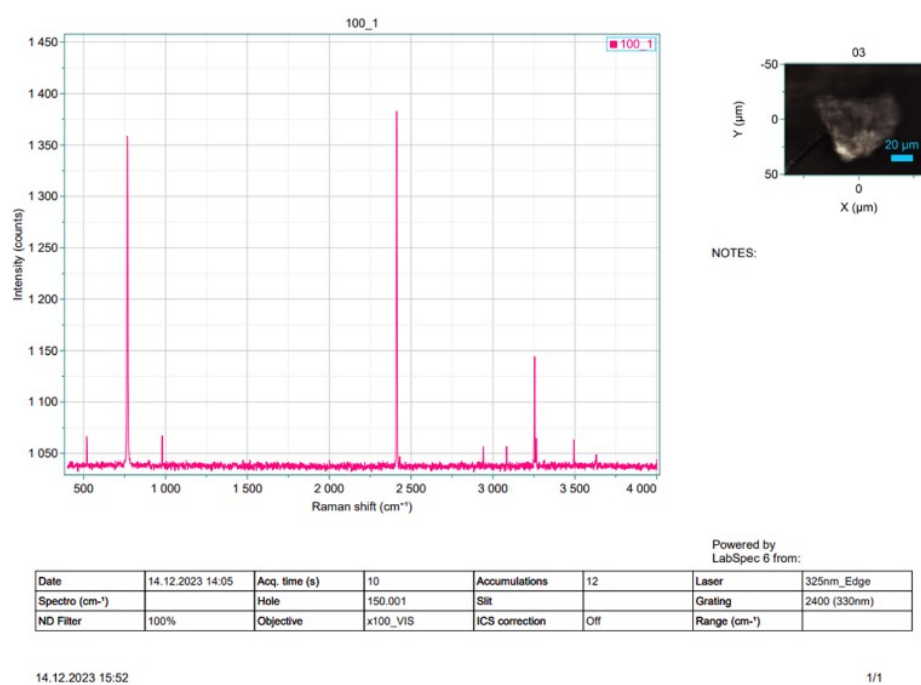

**Fig. S16** Raman spectra of the Ni(O)(OH)/Ni-corrrole after 100 cycles.<sup>6</sup>

**Reference:**

4. K. M. Cole, D. W. Kirk and S. J. Thorpe, *J. Electrochem. Soc.* 2018, **165**, 3122.

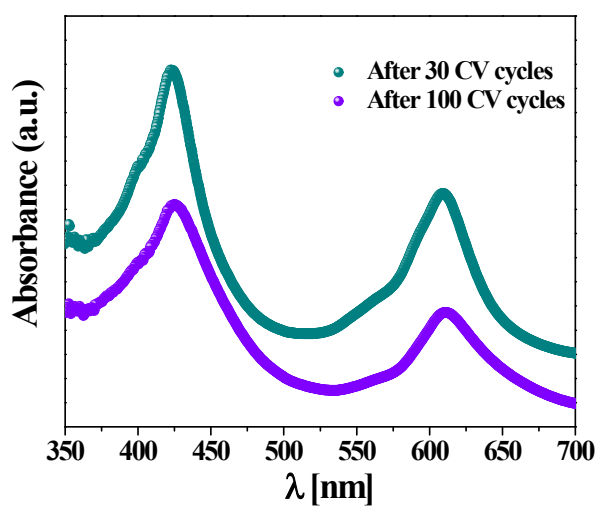

**Fig. S17** UV-visible spectra showed the peaks corresponding to the Ni(O)(OH)/Ni-corrrole after 30 CV cycles and 100 CV cycles activation.<sup>7</sup>

**Reference:**

5. S. Eulberg, N. Schulze, J. Krumsieck, N. Klein and M. Bröring, *Angew. Chemie Int. Ed.* 2023, **62**, e202306598.

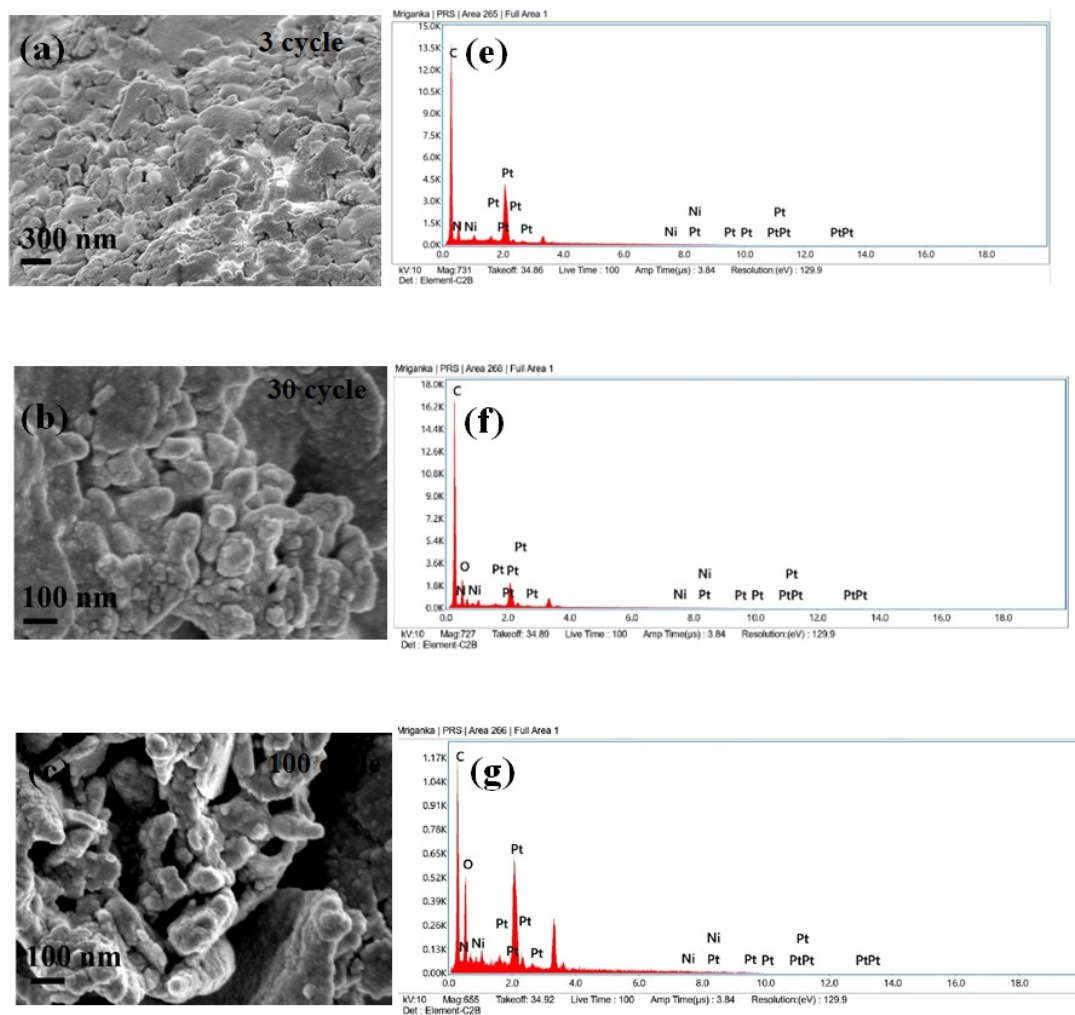

**Fig. S18** (a-c) The SEM and EDX studies of Ni(O)(OH)/Ni-corrole after the different CV cycle-activation showed a change in the morphological feature. (e-g) The EDX data of the catalyst after 3 cycles, 30 cycles, and 100 cycles of CV activation showed that Ni, C, N, O, and S but with a varying amount.

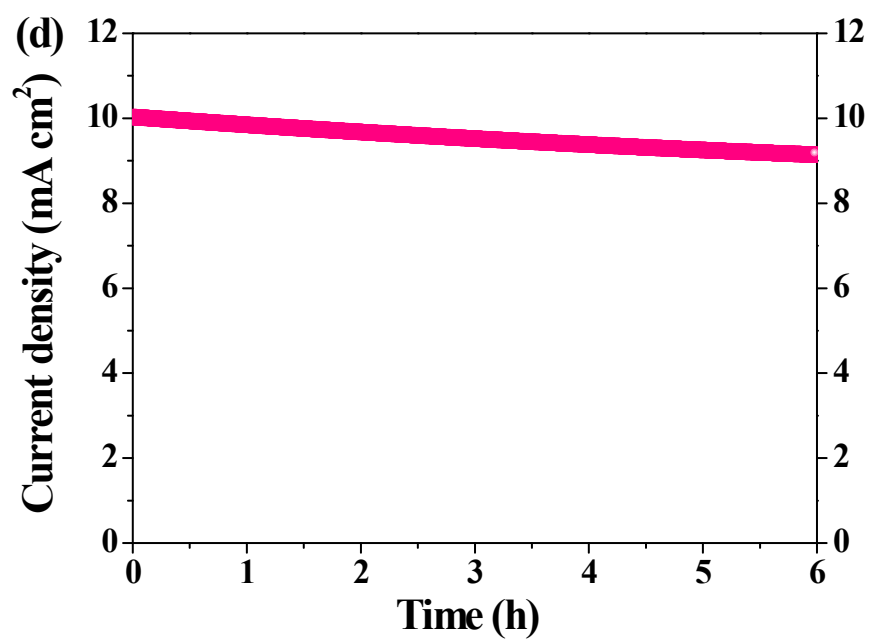

**Fig. S19** The chronoamperometric study of Ni(O)(OH)/Ni-corrole demonstrates the stability of the catalyst for 6 hours.

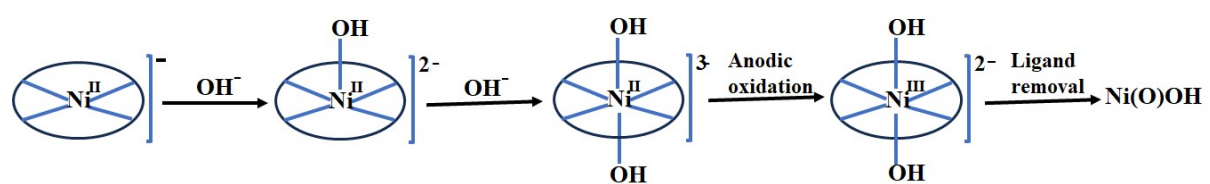

**Fig. S20** The plausible mechanism for the formation of  $\text{Ni(O)OH}$  from the Ni-corrole complex by the anodic activation in the alkaline medium.
